# Supplementary material
Source: publisher figshare collection journal article supplement (https://acs.figshare.com/ndownloader/files/3780883)
Supplement: Supplementary file 1 [file 3780883]

2	O=C1OC2=CC(OCCCN(C)CC3=CC=CC=C3)=CC=C2C(C)=C1C
3	O=C1OC2=CC(OCCCN(CC)CC3=CC=CC=C3)=CC=C2C(C)=C1C
4	O=C1OC2=CC(OCCCCN(C)CC3=CC=CC=C3)=CC=C2C(C)=C1C
5	O=C1OC2=CC(OCCCCCNCC3=CC=CC=C3)=CC=C2C(C)=C1C
6	O=C1OC2=CC(OCCCCCN(C)CC3=CC=CC=C3)=CC=C2C(C)=C1C
7	O=C1OC2=CC(OCCCCCN(C)CC3=CC(C#N)=CC=C3)=CC=C2C(C)=C1C
8	O=C1OC2=CC(OCCCCCN(C)CC3=CC(Cl)=CC=C3)=CC=C2C(C)=C1C
9	O=C1OC2=CC(OCCCCCN(C)CC3=CC=C(C#N)C=C3)=CC=C2C(C)=C1C
10	O=C1OC2=CC(OCCCCCN(CC)CC3=CC=CC=C3)=CC=C2C(C)=C1C
11	O=C1OC2=CC(OCCCCCCN(C)CC3=CC=CC=C3)=CC=C2C(C)=C1C
12	O=C1OC2=CC(OCCCCCCN(CC)CC3=CC=CC=C3)=CC=C2C(C)=C1C
13	O=C1OC2=CC(OCC3=CC(CN(C)C)=CC=C3)=CC=C2C=C1
14	O=C1OC2=CC(OCC3=CC(CN(CC)CC)=CC=C3)=CC=C2C=C1
15	O=C1OC2=CC(OCC3=CC(CN(C)CC4=CC=CC=C4)=CC=C3)=CC=C2C=C1
16	O=C1OC2=CC(OCC3=CC(CN(C)CC4=CC=CC(C#N)=C4)=CC=C3)=CC=C2C=C1
17	O=C1OC2=CC(OCC3=CC(CN(C)CC4=CC=CC(OC)=C4)=CC=C3)=CC=C2C=C1
18	O=C1OC2=CC(OCC3=CC(CN(C)CC4=CC=CC(Cl)=C4)=CC=C3)=CC=C2C=C1
19	O=C1OC2=CC(OCC3=CC=C(CN(C)C)C=C3)=CC=C2C=C1
20	O=C1OC2=CC(OCC3=CC=C(CN(CC)CC)C=C3)=CC=C2C=C1
21	O=C1OC2=CC(OCC3=CC=C(CN(CC4=CC=CC=C4)C)C=C3)=CC=C2C=C1
22	O=C1OC2=CC(OCC3=CC=C(CN(CC4=CC=CC=C4)C)C=C3)=CC=C2C=C1C
23	O=C1OC2=CC(OCC3=CC=C(CN(CC4=CC=CC=C4)C)C=C3)=CC=C2C(C)=C1
24	O=C1OC2=CC(OCC3=CC=C(CN(CC4=CC=CC=C4)C)C=C3)=CC=C2C(C)=C1C
25	O=C1OC2=CC(OCC3=CC=C(CN(CC4=CC=CC(C#N)=C4)C)C=C3)=CC=C2C=C1
26	O=C1OC2=CC(OCC3=CC=C(CN(CC4=CC=CC(OC)=C4)C)C=C3)=CC=C2C=C1
27	O=C1OC2=CC(OCC3=CC=C(CN(CC4=CC=CC(Cl)=C4)C)C=C3)=CC=C2C=C1
28	O=C1OC2=CC(OCC3=CC=C(CN(CC4=CC=CC(Cl)=C4)C)C=C3)=CC=C2C=C1C
29	O=C1OC2=CC(OCC3=CC=C(CN(CC4=CC=CC(Cl)=C4)C)C=C3)=CC=C2C(C)=C1
30	O=C1OC2=CC(OCC3=CC=C(CN(CC4=CC=CC(Cl)=C4)C)C=C3)=CC=C2C(C)=C1C
31	O=C1OC2=CC(OCC3=CC=C(CN(CC4=CC=C(C#N)C=C4)C)C=C3)=CC=C2C=C1
32	O=C1OC2=CC(OCC3=CC=C(CN(CC4=CC=C(C#N)C=C4)C)C=C3)=CC=C2C=C1C
33	O=C1OC2=CC(OCC3=CC=C(CN(CC4=CC=C(C#N)C=C4)C)C=C3)=CC=C2C(C)=C1
34	O=C1OC2=CC(OCC3=CC=C(CN(CC4=CC=C(C#N)C=C4)C)C=C3)=CC=C2C(C)=C1C
35	O=C1OC2=CC(OCC3=CC=C(CN(CC4=CC=CC=C4)C)C=C3)=CC=C2C=C1C#N
36	O=C1OC2=CC(OCC3=CC=C(CN(CC4=CC=C(C#N)C=C4)C)C=C3)=CC=C2C=C1C#N
37	O=C1OC2=CC(OCC3=CC=C(CN(CC4=CC=CC=C4)C)C=C3)=CC=C2C(CO)=C1
38	O=C1OC2=CC(OCC3=CC=C(CNCC4=CC=CC=C4)C=C3)=CC=C2C(CO)=C1
39	O=C1OC2=CC(OCC3=CC=C(CN(CC4=CC=CC(Cl)=C4)C)C=C3)=CC=C2C(CO)=C1
40	O=C1OC2=CC(OCC3=CC=C(CN(C)CC4=CC=C(C#N)C=C4)C=C3)=CC=C2C(CO)=C1
42	O=C1OC2=CC(OCC3=CC=C(CCN(C)CC4=CC=CC=C4)C=C3)=CC=C2C=C1
43	O=C1OC2=CC(OCC3=CC=C(CCNCC4=CC=CC=C4)C=C3)=CC=C2C=C1
45	O=C1NC2=CC(OCC3=CC=C(CN(C)CC4=CC=CC=C4)C=C3)=CC=C2C=C1
